# Supplementary figures and images for: Impact of exact segment by segment primary tumor location status on anti-EGFR antibody first-line treatment efficacy in RAS/BRAF wild-type and BRAF mutant metastatic colorectal cancer. A pooled analysis of AIO studies FIRE-1, CIOX, FIRE-3, XELAVIRI, and VOLFI.
Source: Research Square preprint supplement (doi:10.21203/rs.3.rs-219007/v1), 2021-02-24

**Supplementary figure 4:
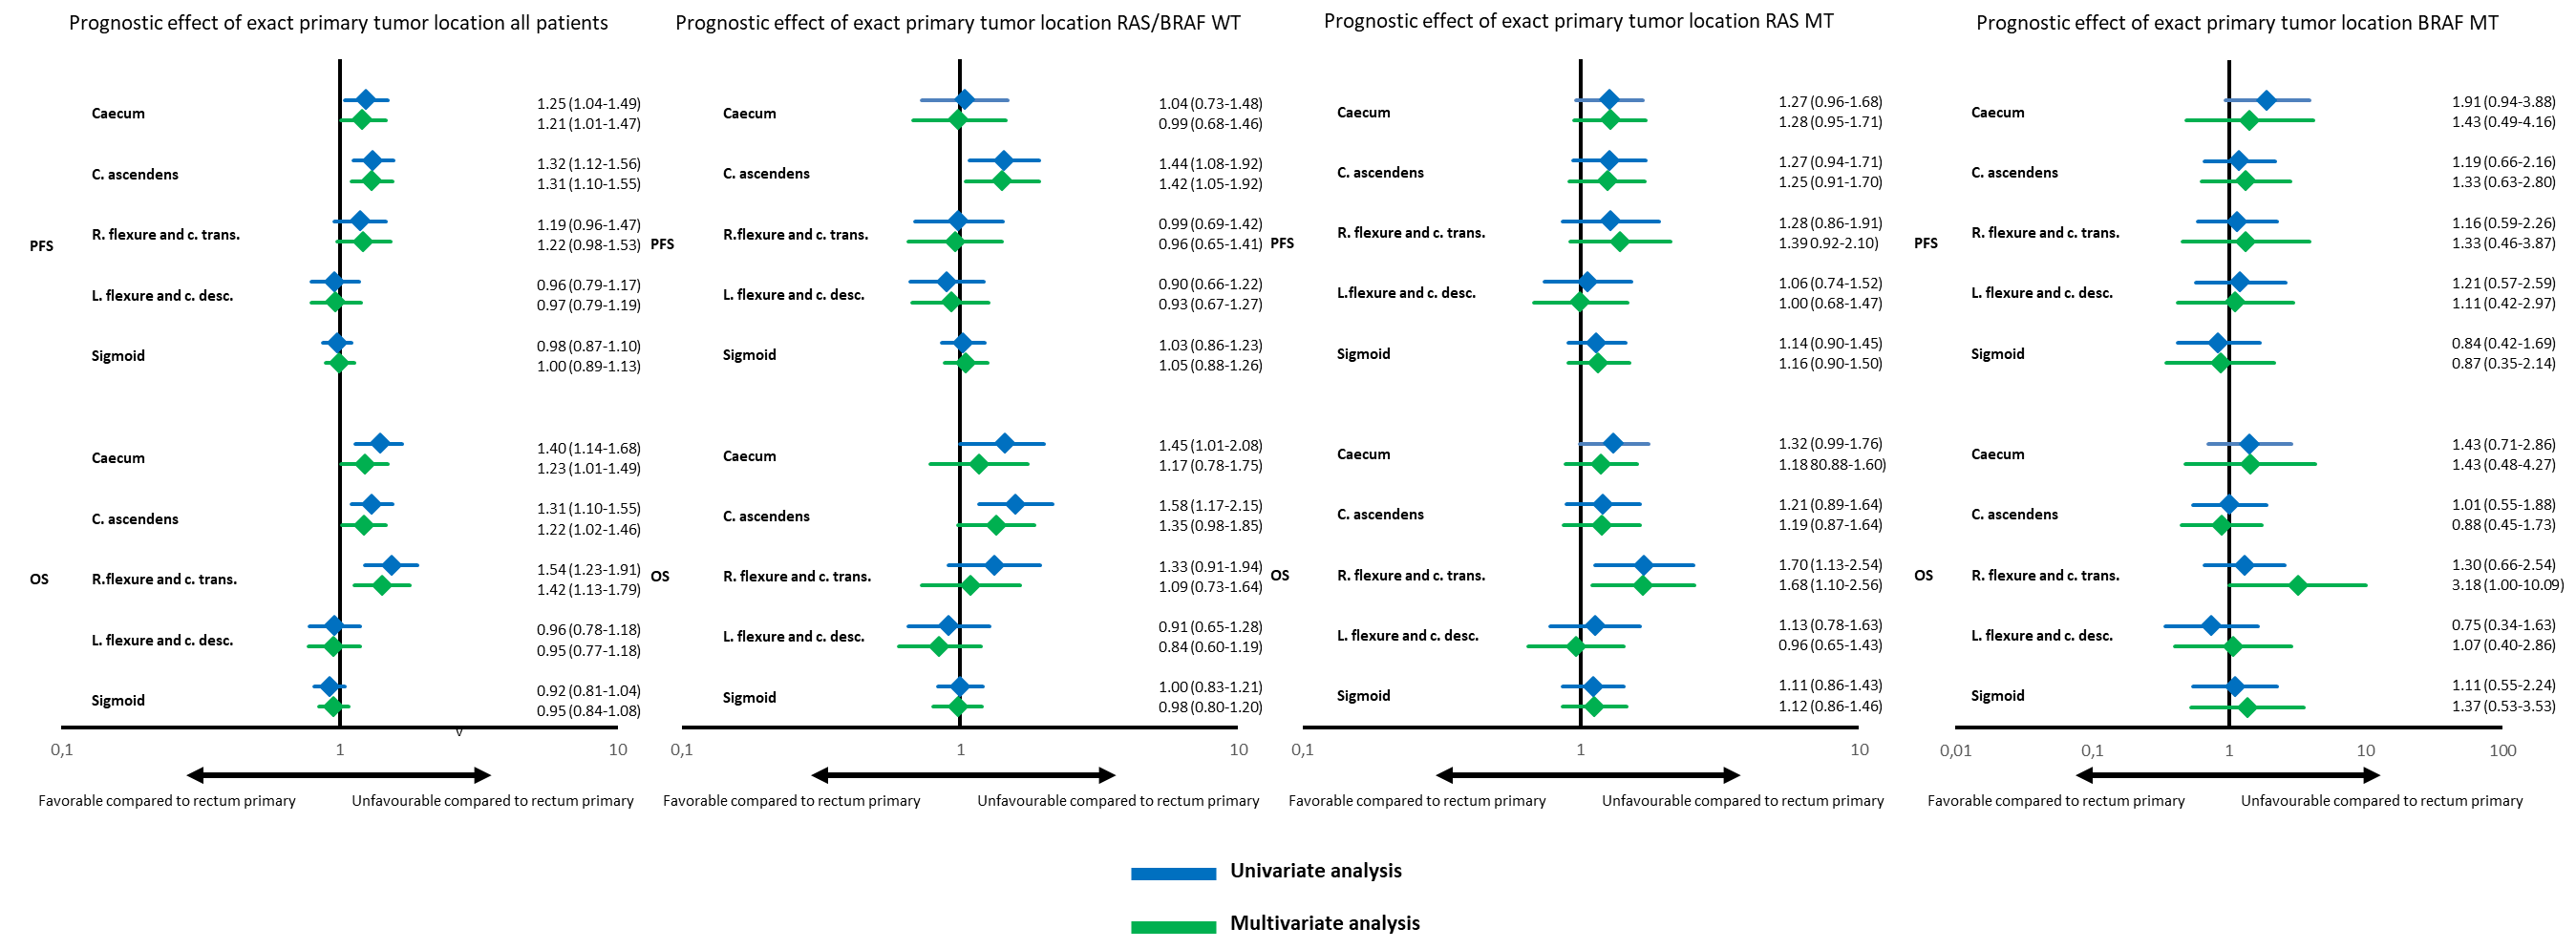
**

Supplement: Supplementary file 1 [file 972d020a70a8c650eba93823.docx]

**Supplementary figure 3: Objective response rate according to primary location**


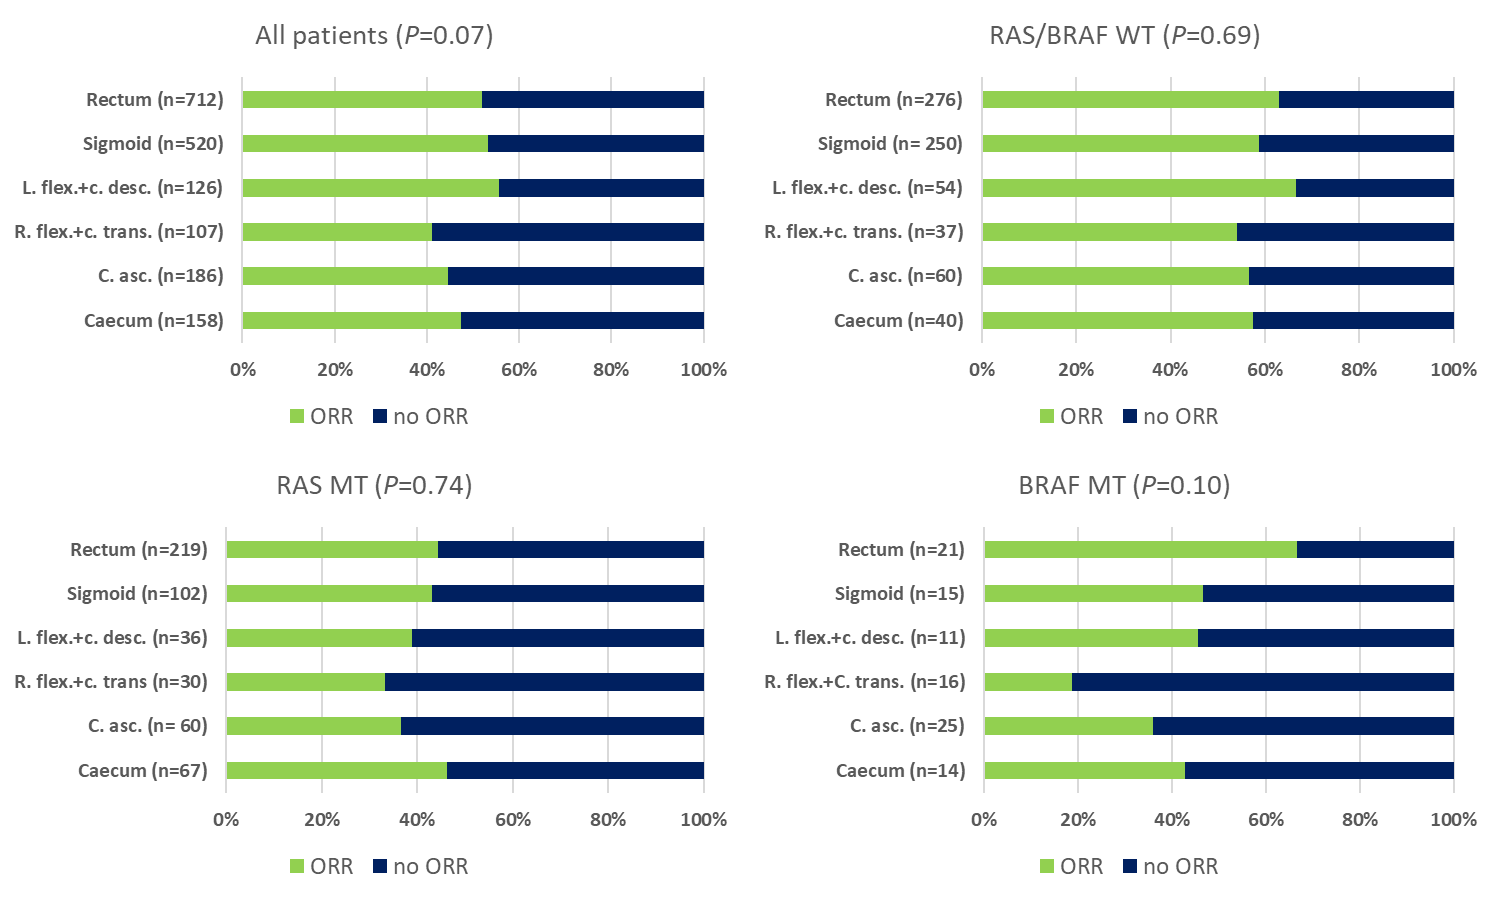

Supplement: Supplementary file 2 [file a36f6b94f8a3723dd94291df.docx]
